# Supplementary material
Source: MDPI journal article supplement (https://www.mdpi.com/2071-1050/12/8/3240)

## Supplementary material

**Table SI.** Observed systems and crops within the different arable rotations, soil properties of the experimental sites, selected agronomic practices and sowing date during the experimental years (1<sup>st</sup> year: September 2012 – August 2013, 2<sup>nd</sup> year: September 2013 – August 2014).

| Rotation element    | Crop         | Experimental year | pH*       | P <sub>2</sub> O <sub>5</sub> [mg/100g]* | K <sub>2</sub> O [mg/100g]* | Mg [mg/100g]* | C/N* | Stubble cultivation | Primary soil tillage | Sowing date |
|---------------------|--------------|-------------------|-----------|------------------------------------------|-----------------------------|---------------|------|---------------------|----------------------|-------------|
| Organic-low-BNF     | Grass-clover | 1 <sup>st</sup>   | 5.9 (0.4) | 9.0 (0.8)                                | 6.25 (0.8)                  | 10.8 (0.7)    | 11   | 1 ×                 | Plough               | 18-Aug-2012 |
|                     |              | 2 <sup>nd</sup>   | 5.9 (0.3) | -                                        | -                           | -             | 10   | 1 ×                 | Plough               | 06-Sep-2013 |
|                     | Winter wheat | 1 <sup>st</sup>   | 6.1 (0.2) | 12.7 (0.6)                               | 4.7 (0.5)                   | 4.6 (0.1)     | 11   | 3 ×                 | Plough               | 02-Oct-2012 |
|                     |              | 2 <sup>nd</sup>   | 6.0 (0.3) | -                                        | -                           | -             | 10   | 1 ×                 | Plough               | 02-Oct-2013 |
|                     | Winter rye   | 1 <sup>st</sup>   | 6.0 (0.2) | 18.0 (1.4)                               | 6.8 (0.4)                   | 9.1 (1.4)     | 11   | 3 ×                 | Plough               | 19-Sep-2012 |
|                     |              | 2 <sup>nd</sup>   | 6.1 (0.1) | -                                        | -                           | -             | 11   | 3 ×                 | Plough               | 25-Sep-2013 |
|                     | Oats         | 1 <sup>st</sup>   | 5.9 (0.2) | 9.0 (0.0)                                | 6.5 (0.9)                   | 10.0 (0.5)    | 10   | 3 ×                 | Plough               | 09-Apr-2013 |
|                     |              | 2 <sup>nd</sup>   | 6.0 (0.1) | -                                        | -                           | -             | 11   | 3 ×                 | Plough               | 04-Mar-2014 |
| Organic-semi-BNF    | Grass-clover | 1 <sup>st</sup>   | 6.4 (0.2) | 19.0 (0.8)                               | 8.0 (0.7)                   | 9.4 (0.8)     | 10   | 1 ×                 | Plough               | 18-Aug-2012 |
|                     |              | 2 <sup>nd</sup>   | 6.0 (0.2) | -                                        | -                           | -             | 10   | 1 ×                 | Plough               | 04-Sep-2013 |
|                     | Winter wheat | 1 <sup>st</sup>   | 5.8 (0.1) | 11.8 (0.9)                               | 8.9 (1.8)                   | 5.2 (0.7)     | 11   | 3 ×                 | Plough               | 01-Oct-2012 |
|                     |              | 2 <sup>nd</sup>   | 6.4 (0.1) | -                                        | -                           | -             | 10   | 1 ×                 | Plough               | 01-Oct-2013 |
|                     | Winter rye   | 1 <sup>st</sup>   | 6.0 (0.1) | 13.3 (3.3)                               | 6.8 (1.3)                   | 9.1 (0.3)     | 11   | 3 ×                 | Plough               | 19-Sep-2012 |
|                     |              | 2 <sup>nd</sup>   | 5.8 (0.2) | -                                        | -                           | -             | 11   | 3 ×                 | Plough               | 23-Sep-2013 |
|                     | Peas         | 1 <sup>st</sup>   | 6.8 (0.1) | 17.25 (2.1)                              | 7.8 (1.3)                   | 14.4 (1.2)    | 11   | 3 ×                 | Plough               | 20-Apr-2013 |
|                     |              | 2 <sup>nd</sup>   | 6.0 (0.0) | -                                        | -                           | -             | 10   | 2 ×                 | Plough               | 02-Apr-2014 |
| Conventional        | Oilseed rape | 1 <sup>st</sup>   | 6.7 (0.1) | 18.8 (3.3)                               | 13.3 (0.8)                  | 10.9 (0.8)    | 10   | 1 ×                 | Cultivator           | 24-Aug-2012 |
|                     |              | 2 <sup>nd</sup>   | 6.6 (0.2) | -                                        | -                           | -             | 10   | 1 ×                 | Plough               | 30-Aug-2013 |
|                     | Winter wheat | 1 <sup>st</sup>   | 6.8 (0.1) | 13.3 (1.3)                               | 13.3 (2.3)                  | 14.3 (0.7)    | 11   | 2 ×                 | Cultivator           | 19-Sep-2012 |
|                     |              | 2 <sup>nd</sup>   | 6.7 (0.2) | -                                        | -                           | -             | 10   | 2 ×                 | Cultivator           | 23-Sep-2013 |
|                     | Winter wheat | 1 <sup>st</sup>   | 6.4 (0.1) | 24.0 (0.8)                               | 13.8 (1.5)                  | 13.6 (0.9)    | 10   | 2 ×                 | Plough               | 29-Sep-2012 |
|                     |              | 2 <sup>nd</sup>   | 6.6 (0.0) | -                                        | -                           | -             | 11   | 2 ×                 | Plough               | 02-Oct-2013 |
|                     | Sugar beet   | 1 <sup>st</sup>   | 6.5 (0.1) | 16.3 (1.0)                               | 11.5 (1.7)                  | 8.9 (1.4)     | 11   | -                   | Cultivator           | 09-Apr-2013 |
|                     |              | 2 <sup>nd</sup>   | 6.6 (0.2) | -                                        | -                           | -             | 11   | -                   | Cultivator           | 14-Mar-2014 |
| Permanent grassland | Grassland    | 1 <sup>st</sup>   | 6.6 (0.1) | 11.5 (0.6)                               | 11.5 (1.6)                  | 14.0 (0.6)    | 11   | -                   | Direct seed          | 30-Oct-2012 |
|                     |              | 2 <sup>nd</sup>   | 6.5 (0.1) | -                                        | -                           | -             | 10   | -                   | Plough               | 06-Oct-2013 |
| Beech-forest        | Woodland     | 1 <sup>st</sup>   | 5.9 (0.2) | 15.5 (1.3)                               | 6.8 (2.6)                   | 9.7 (1.6)     | 11   | -                   | -                    | Aug-2004    |
|                     |              | 2 <sup>nd</sup>   | 5.9 (0.1) | -                                        | -                           | -             | 11   | -                   | -                    | -           |
| Beech-forest        | Woodland     | 1 <sup>st</sup>   | 3.6 (0.0) | 4.0 (0.8)                                | 13.8 (0.5)                  | 12.5 (0.5)    | 15   | -                   | -                    | -           |
|                     |              | 2 <sup>nd</sup>   | 3.6 (0.0) | -                                        | -                           | -             | 15   | -                   | -                    | -           |

\*values are for 0-30 cm soil depth. C/N: mean value from biannual samplings during period I (n=8) and II (n=8); Major nutrients (n=4); Stubble cultivation was conducted by disc harrow or cultivator. Values in brackets show the standard deviation.

**Figure S1.** Daily  $\text{N}_2\text{O}$ - (black line and dots) and  $\text{CH}_4$ -fluxes (grey line and dots) of the reference systems (grassland and beech forest) during the study period (Oct 2012 - Oct 2014). Grey background represents periods with mean daily temperatures below  $0^\circ\text{C}$ . Mean values are shown (n=4).

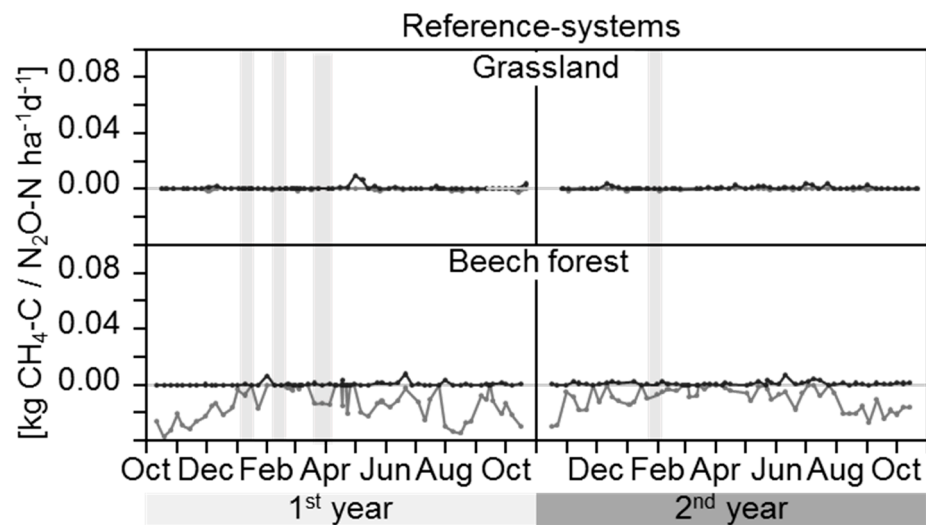

Supplement: s1 [file s1]
